# Supplementary figures and images for: Bacterial low-abundant taxa are key determinants of a healthy airway metagenome in the early years of human life
Source: PubMed Central journal article supplement — Comput Struct Biotechnol J. 2021 Dec 15;20:175–86. doi: 10.1016/j.csbj.2021.12.008 (PMC8713036; doi:10.1016/j.csbj.2021.12.008), 2021-12-15

**A**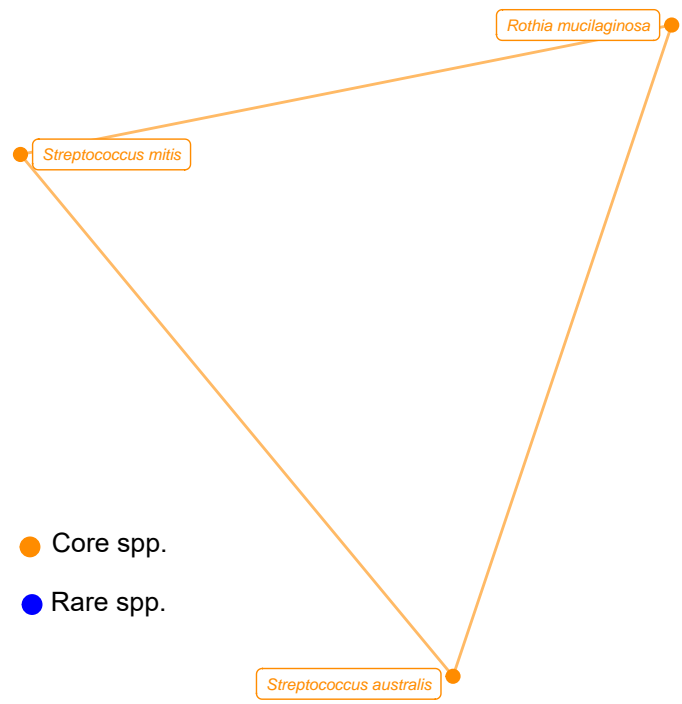

- Core spp.
- Rare spp.

**B**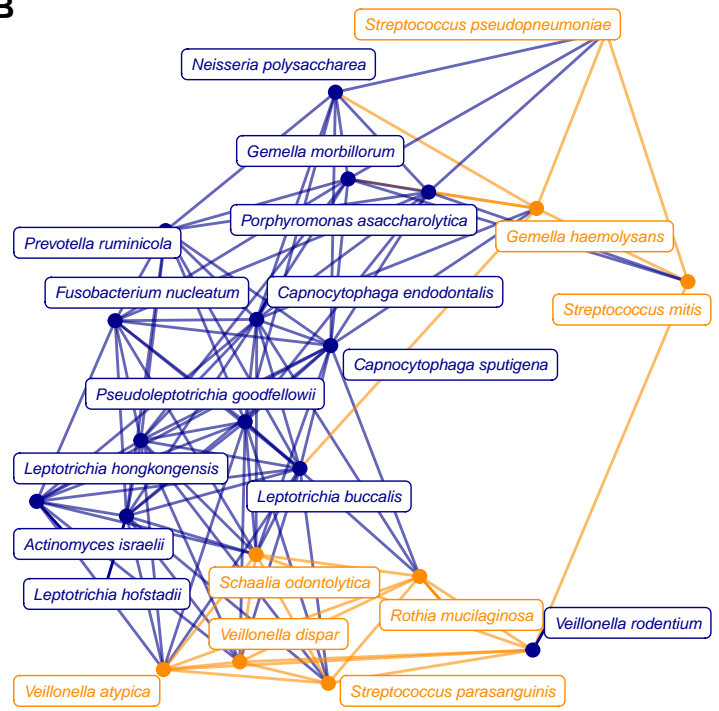**C**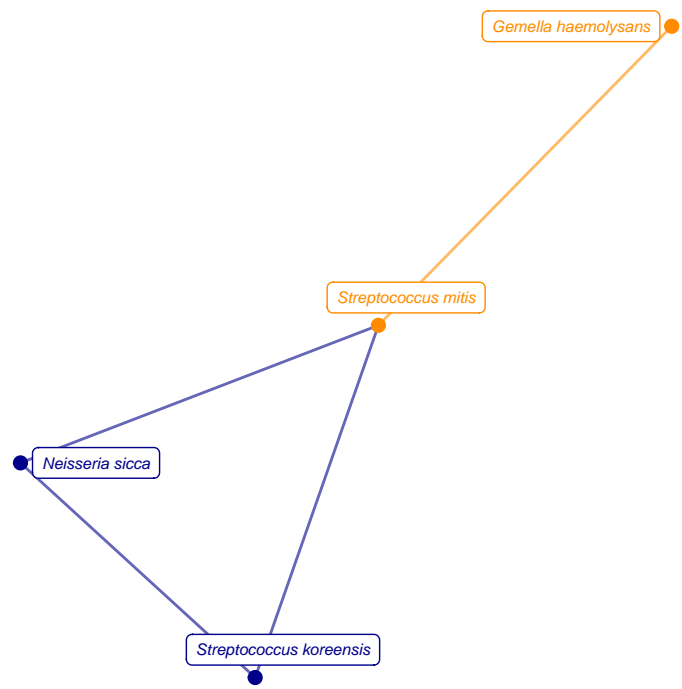**D**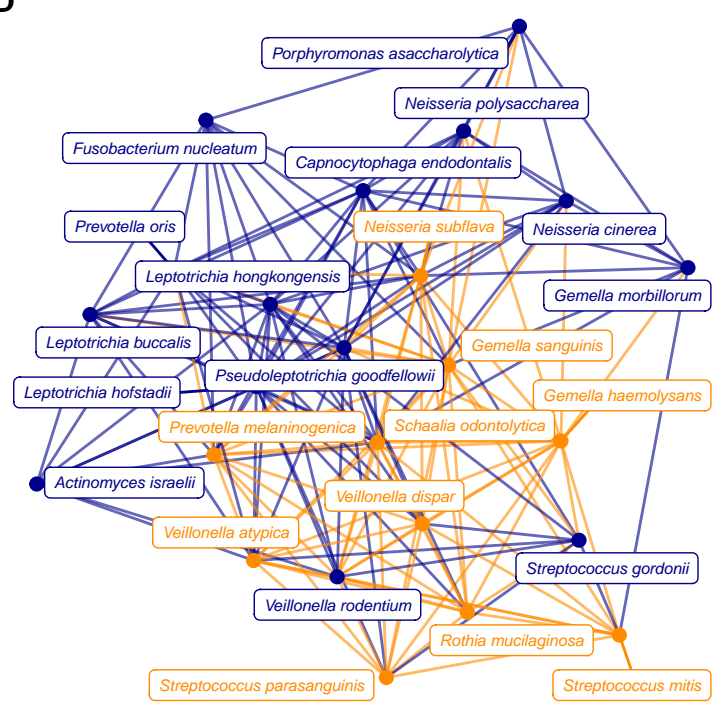

Supplement: mmc10.pdf [file mmc10.pdf]

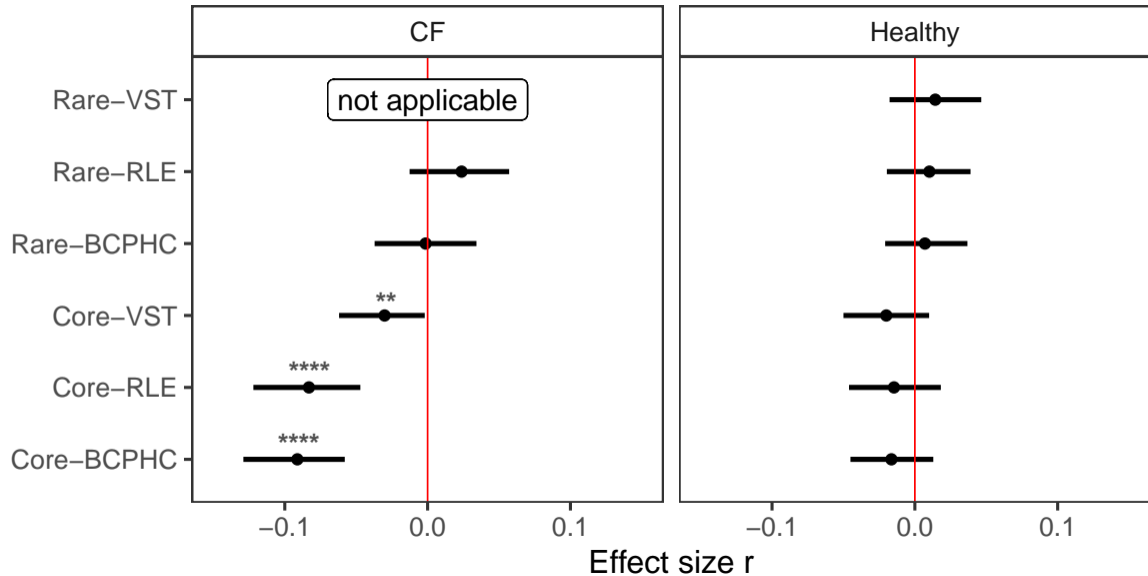

Supplement: mmc8.pdf [file mmc8.pdf]
